# Supplementary material for: Development of Pectin and Poly(vinyl alcohol)-Based Active Packaging Enriched with Itaconic Acid and Apple Pomace-Derived Antioxidants
Source: MDPI journal article supplement (doi:10.3390/antiox11091729), 2022-08-31
Supplement: s1 [file s1]

**Figure S1.** Chromatograms of organic acids **(a)**. standard: 1-oxalic Rt=2.94min; 2-malic Rt=3.15 min; 3-citric Rt=3.31 min; 4-succinic Rt=3.76 min; 5-fumaric Rt=4.18 min; **(B)**. Frozen apple; **(c)**. Lyophilized apple

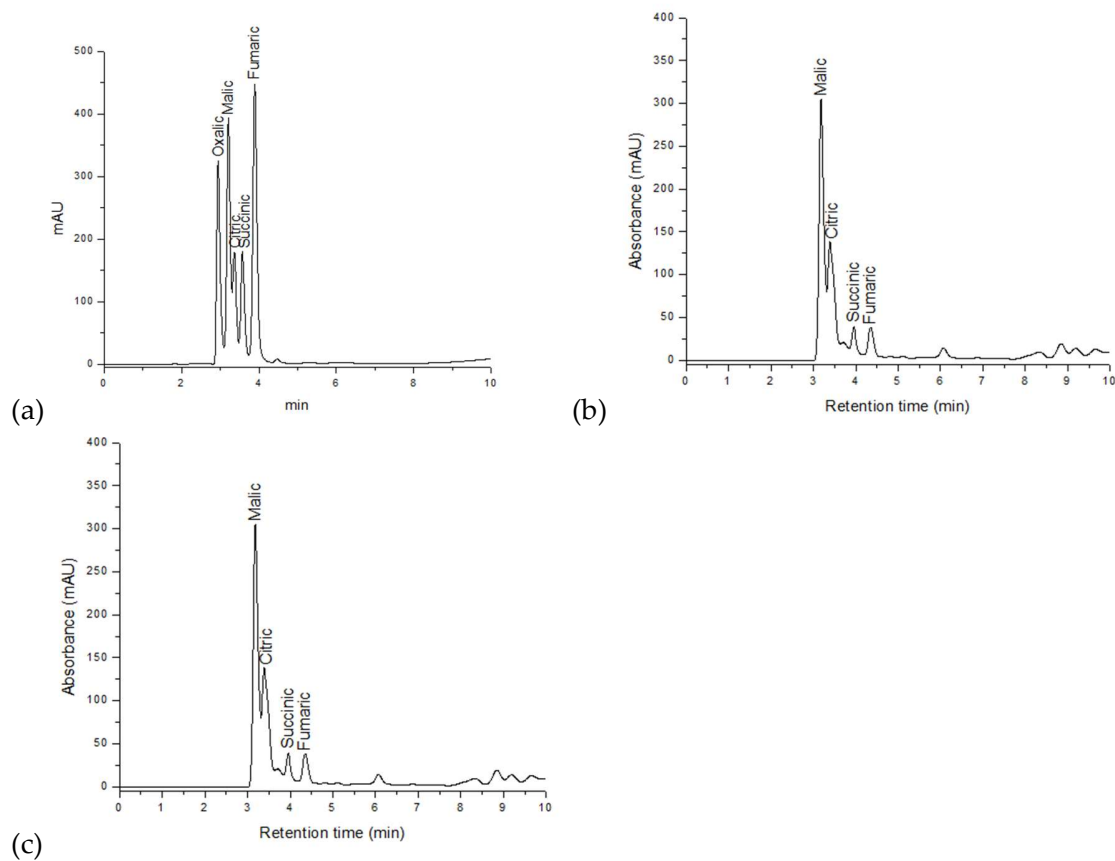

**Figure S2.** Chromatograms of phenolic compounds **(a)** Frozen apple - 280 nm, **(b)** Frozen apple - 340 nm; **(c)** Frozen apple - 520 nm; **(d)** Lyophilized apple - 280 nm; **(e)** Lyophilized apple - 340 nm; **(f)** Lyophilized apple - 520 nm

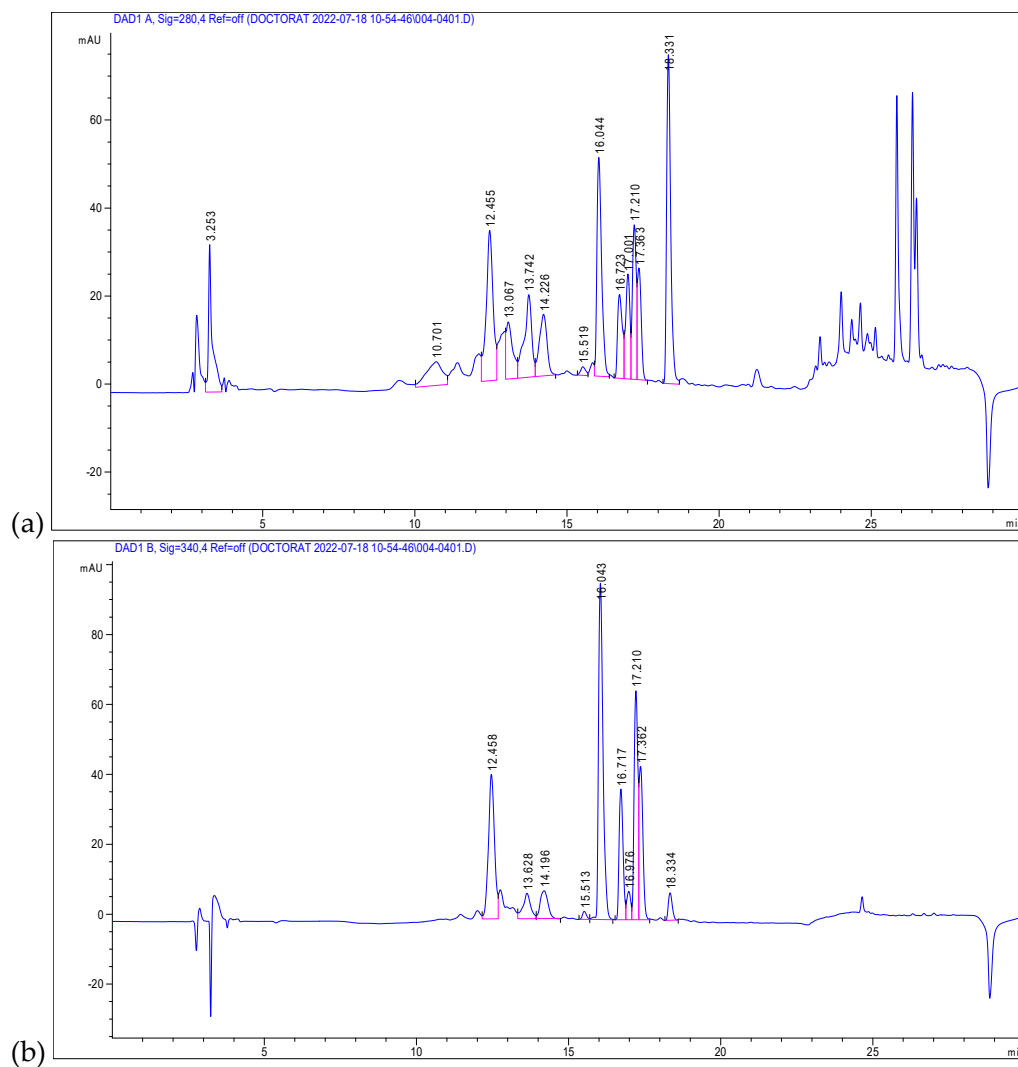

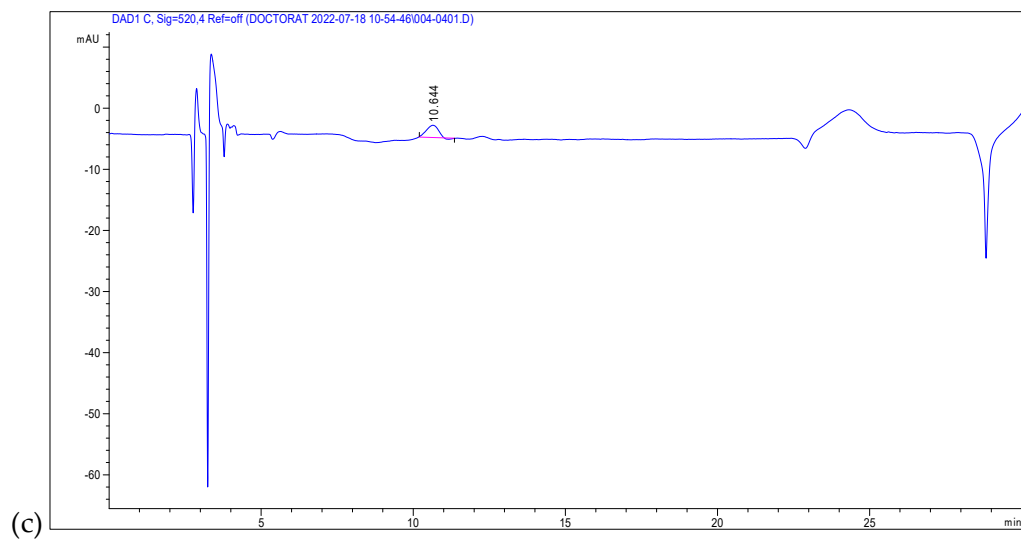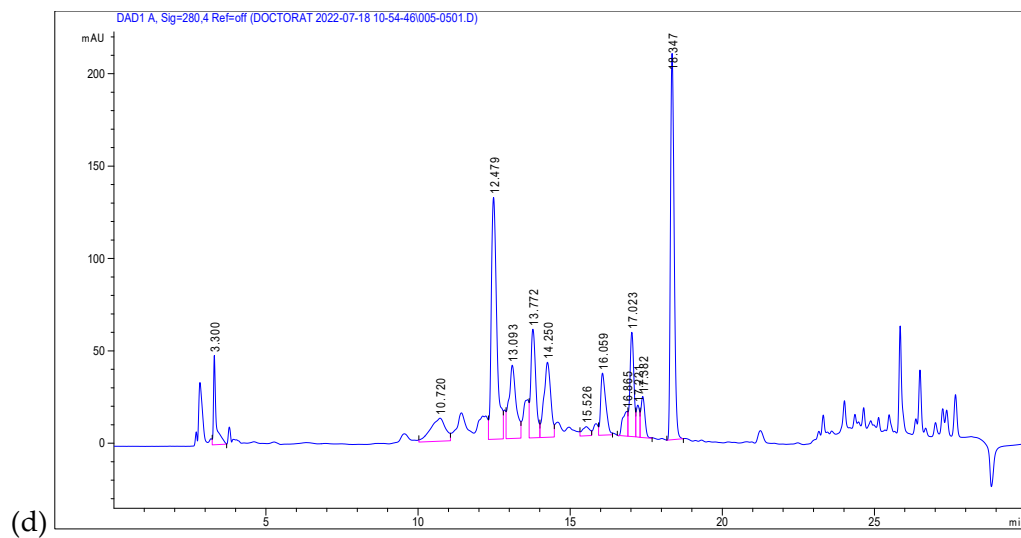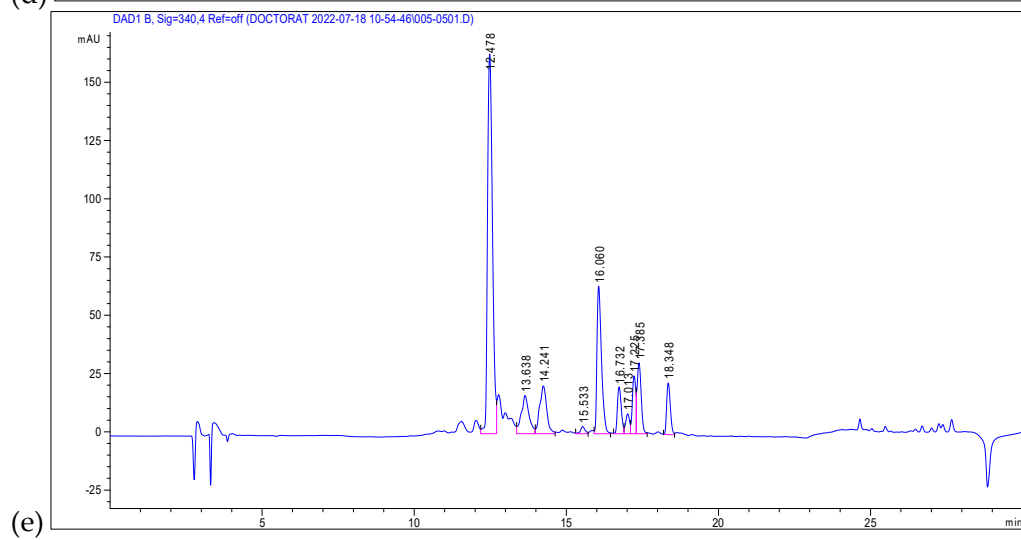

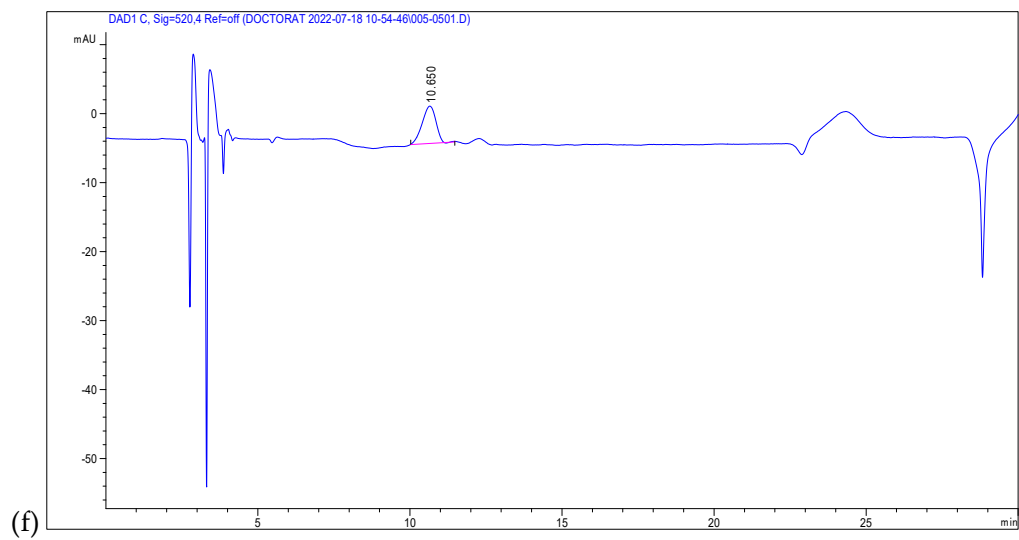

**Table S1.** Minimum inhibitory concentration against *E. coli*, *S. aureus*, *S. epidermidis*, *P. aeruginosa*, *E. faecalis*, *S. pyand* and *S. enterica*.

| Gram (+) Bacteria |                  |                       |                |                    |                    | Gram (-) Bacteria    |                    |
|-------------------|------------------|-----------------------|----------------|--------------------|--------------------|----------------------|--------------------|
| Samples           | <i>S. aureus</i> | <i>S. epidermidis</i> | <i>E. coli</i> | <i>E. faecalis</i> | <i>S. pyogenes</i> | <i>P. aeruginosa</i> | <i>S. enterica</i> |
| AP-PE             | n.b              | n.b                   | n.b            | n.b.               | n.b                | n.b                  | n.b.               |
| FD-AP-PE          | n.b              | n.b                   | n.b            | n.b.               | n.b                | n.b                  | n.b.               |
| AP-OE             | n.b              | n.b                   | n.b            | n.b.               | n.b                | n.b                  | n.b.               |
| FD-AP-OE          | n.b              | n.b                   | n.b            | n.b.               | n.b                | n.b                  | n.b.               |
| B-PE-PVA          | n.b              | n.b                   | n.b            | n.b.               | n.b                | n.b                  | n.b.               |
| B-PE-PEC          | n.b              | n.b                   | n.b            | n.b.               | n.b                | n.b                  | n.b.               |
| B-OE-PVA          | n.b              | n.b                   | n.b            | n.b.               | n.b                | n.b                  | n.b.               |
| B-OE-PEC          | n.b              | n.b                   | n.b            | n.b.               | n.b                | n.b                  | n.b.               |

AP-PE – Phenolic extract of frozen apple pomace, FD-AP-PE – Phenolic extract of freeze-dried apple pomace, AP-OE – Organic extract of frozen apple pomace, FD-AP-OE – Organic extract of freeze-dried apple pomace, B-PE-PVA – PVA biofilm with phenolic extract, B-PE-PEC – Pectin biofilm with phenolic extract, B-OE-PVA – PVA biofilm with organic extract, B-PE-PEC – Pectin biofilm with organic extract, n.b. – no bioactivity
